# Supplementary material for: A Longitudinal Study of Acculturation in Context and Cardiovascular Health and Their Effects on Cognition Among Older Latino Adults
Source: PubMed Central journal article supplement — J Am Heart Assoc. 2023 Mar 16;12(6):e027620. doi: 10.1161/JAHA.122.027620 (PMC10111521; doi:10.1161/jaha.122.027620), 2023-03-16
Supplement: JAH3-12-e027620-s001.pdf [file JAH3-12-e027620-s001.pdf]

## **SUPPLEMENTAL MATERIAL**

**Table S1.** List of the five cognitive domains and the items that comprised each composite score

| <b>COGNITIVE DOMAIN</b> | <b>NEUROPSYCHOLOGICAL TESTS (AND ITEMS) INCLUDED</b>                                                                                                                                                                                                                                                     |
|-------------------------|----------------------------------------------------------------------------------------------------------------------------------------------------------------------------------------------------------------------------------------------------------------------------------------------------------|
| Episodic Memory         | The Consortium to Establish a Registry for Alzheimer's Disease (CERAD) Word List Recall Immediate, Delayed, and Recognition; Immediate and Delayed Recall of Story A from the Logical Memory Subtest of the Wechsler Memory Scale-Revised (WMS-R); Immediate and Delayed Recall of the East Boston Story |
| Semantic Memory         | Verbal Fluency from the CERAD; 15-item Boston Naming Test; 15-item reading test                                                                                                                                                                                                                          |
| Working Memory          | Digit Span Forward and Backward from the WMS-R; Digit Ordering                                                                                                                                                                                                                                           |
| Perceptual Speed        | Symbol Digits Modality Test (oral); Number Comparison; Stroop Color Naming and Word Reading                                                                                                                                                                                                              |
| Visuospatial Ability    | Progressive Matrices; 15-item Judgement of Line Orientation                                                                                                                                                                                                                                              |

**Table S2.** Baseline Characteristics for Participants with and without Familism

|                         | <b>Familism Score</b>     |                          | Relevant statistical comparison |
|-------------------------|---------------------------|--------------------------|---------------------------------|
|                         | <b>Present</b><br>(n=139) | <b>Missing</b><br>(n=53) |                                 |
| Age (years)             | 70.1 (6.1)                | 68.5 (7.8)               | t-test=-1.30, p=0.19            |
| Sex (male:female ratio) | 29:110                    | 8:45                     | Chi-squared=0.82, p=0.36        |
| Education (years)       | 10.5 (4.7)                | 11.9 (4.5)               | t-test=1.87, p=0.063            |
| CESD-10                 | 1.8 (2.2)                 | 1.3 (1.9)                | Wilcoxon Z=-1.47, p=0.14        |

*Note.* All values are mean (standard deviation) unless other-wise noted. CESD-10=10-item version of the Center for Epidemiologic Study of Depression.

**Table S3.** Effect modification of modified Life's Simple 7 (mLS7) scores on the associations between acculturation in context and cognition (focus of the current research) plus direct associations between mLS7 and acculturation in context with cognition

|                                                                                                       | <b>Global<br/>Cognition</b>           | <b>Episodic<br/>Memory</b> | <b>Semantic<br/>Memory</b>           | <b>Working<br/>Memory</b>             | <b>Perceptual<br/>Speed</b>           | <b>Visuospatial<br/>Ability</b> |
|-------------------------------------------------------------------------------------------------------|---------------------------------------|----------------------------|--------------------------------------|---------------------------------------|---------------------------------------|---------------------------------|
| <b>EFFECT MODIFICATION OF mLS7 ON THE ASSOCIATIONS BETWEEN ACCULTURATION IN CONTEXT AND COGNITION</b> |                                       |                            |                                      |                                       |                                       |                                 |
| <b>mLS7*Acculturation-<br/>related factors</b>                                                        | -0.001 (0.02)<br>p=0.95               | -0.007 (0.02)<br>p=0.80    | -0.002 (0.03)<br>p=0.94              | -0.009 (0.02)<br>p=0.73               | 0.01 (0.03)<br>p=0.62                 | 0.01 (0.03)<br>p=0.63           |
| <b>mLS7*Acculturation-<br/>related factors*time</b>                                                   | -0.002 (0.007)<br>p=0.74              | 0.001 (0.01)<br>p=0.89     | -0.004 (0.01)<br>p=0.72              | <b>-0.02 (0.01)</b><br><b>p=0.043</b> | 0.003 (0.01)<br>p=0.77                | -0.008 (0.01)<br>p=0.63         |
| <b>mLS7*Socioenvironmental<br/>factors</b>                                                            | 0.005 (0.03)<br>p=0.86                | 0.004 (0.04)<br>p=0.91     | 0.005 (0.05)<br>p=0.92               | -0.02 (0.04)<br>p=0.58                | 0.03 (0.05)<br>p=0.53                 | 0.03 (0.05)<br>p=0.55           |
| <b>mLS7*Socioenvironmental<br/>factors*time</b>                                                       | 0.008 (0.009)<br>p=0.36               | -0.003 (0.01)<br>p=0.85    | 0.005 (0.01)<br>p=0.76               | 0.03 (0.01)<br>p=0.097                | 0.02 (0.01)<br>p=0.29                 | 0.01 (0.02)<br>p=0.64           |
| <b>mLS7*Familism</b>                                                                                  | -0.02 (0.02)<br>p=0.29                | 0.004 (0.04)<br>p=0.91     | 0.009 (0.03)<br>p=0.79               | -0.02 (0.02)<br>p=0.37                | -0.009 (0.03)<br>p=0.79               | 0.02 (0.03)<br>p=0.44           |
| <b>mLS7*Familism*time</b>                                                                             | 0.006 (0.006)<br>p=0.30               | 0.006 (0.01)<br>p=0.52     | 0.004 (0.01)<br>p=0.73               | 0.01 (0.01)<br>p=0.18                 | 0.001 (0.01)<br>p=0.90                | -0.001 (0.01)<br>p=0.94         |
| <b>DIRECT ASSOCIATIONS OF mLS7 AND ACCULTURATION IN CONTEXT WITH COGNITION</b>                        |                                       |                            |                                      |                                       |                                       |                                 |
| mLS7                                                                                                  | -0.003 (0.02)<br>p=0.88               | 0.005 (0.03)<br>p=0.86     | -0.02 (0.03)<br>p=0.44               | -0.02 (0.03)<br>p=0.47                | 0.04 (0.03)<br>p=0.23                 | -0.02 (0.03)<br>p=0.42          |
| mLS7*time                                                                                             | <b>0.01 (0.007)</b><br><b>p=0.027</b> | 0.001 (0.01)<br>p=0.89     | <b>0.03 (0.01)</b><br><b>p=0.006</b> | <b>0.02 (0.01)</b><br><b>p=0.039</b>  | 0.01 (0.01)<br>p=0.42                 | 0.03 (0.01)<br>p=0.077          |
| Acculturation-related factors                                                                         | 0.13 (0.06)<br>p=0.024                | 0.09 (0.07)<br>p=0.23      | 0.23 (0.09)<br>p=0.012               | 0.06 (0.07)<br>p=0.36                 | 0.27 (0.09)<br>p=0.003                | 0.15 (0.08)<br>p=0.080          |
| Acculturation-related factors*time                                                                    | -0.03 (0.01)<br>p=0.097               | -0.03 (0.03)<br>p=0.31     | -0.008 (0.03)<br>p=0.79              | -0.007 (0.03)<br>p=0.83               | <b>-0.07 (0.03)</b><br><b>p=0.033</b> | -0.03 (0.04)<br>p=0.42          |

|                                 |                         |                         |                        |                         |                         |                        |
|---------------------------------|-------------------------|-------------------------|------------------------|-------------------------|-------------------------|------------------------|
| Socioenvironmental factors      | -0.15 (0.05)<br>p=0.011 | -0.16 (0.07)<br>p=0.022 | -0.14 (0.09)<br>p=0.11 | -0.16 (0.07)<br>p=0.027 | -0.20 (0.09)<br>p=0.022 | -0.01 (0.08)<br>p=0.88 |
| Socioenvironmental factors*time | 0.007 (0.01)<br>p=0.63  | 0.002 (0.02)<br>p=0.93  | 0.004 (0.03)<br>p=0.87 | -0.01 (0.03)<br>p=0.70  | 0.03 (0.03)<br>p=0.21   | 0.003 (0.04)<br>p=0.93 |
| Familism                        | 0.01 (0.04)<br>p=0.74   | 0.08 (0.05)<br>p=0.12   | -0.07 (0.06)<br>p=0.27 | -0.02 (0.05)<br>p=0.63  | -0.005 (0.06)<br>p=0.94 | -0.08 (0.06)<br>p=0.20 |
| Familism*time                   | -0.005 (0.01)<br>p=0.66 | -0.008 (0.02)<br>p=0.67 | 0.02 (0.02)<br>p=0.28  | -0.006 (0.02)<br>p=0.78 | -0.009 (0.02)<br>p=0.68 | -0.01 (0.03)<br>p=0.65 |

*Note.* Associations between acculturation in context composite scores and cognition have been previously documented<sup>26</sup> and are presented here for confirmation purposes only. Values are unstandardized coefficient (standard error), p-value from fully-adjusted linear mixed effects models including additional terms for time (in study) as well as age, sex, education, depressive symptomatology, and interactions of these variables with time. Bolded terms denote primary focus of analyses while bolded values denote novel findings from the current research using significance of  $p < 0.05$ .
